# 1 Recapitulation of SARS-CoV-2 Infection and 2 Cholangiocyte Damage with Human Liver Organoids

3

4 **Bing Zhao<sup>1,6,\*</sup>, Chao Ni<sup>1,6</sup>, Ran Gao<sup>2,6</sup>, Yuyan Wang<sup>3</sup>, Li Yang<sup>1</sup>, Jinsong Wei<sup>1</sup>, Ting Lv<sup>4</sup>,**  
5 **Jianqing Liang<sup>1</sup>, Qisheng Zhang<sup>5</sup>, Wei Xu<sup>3</sup>, Youhua Xie<sup>3</sup>, Xiaoyue Wang<sup>2</sup>, Zhenghong**  
6 **Yuan<sup>3</sup>, Junbo Liang<sup>2,\*</sup>, Rong Zhang<sup>3,\*</sup> and Xinhua Lin<sup>1,\*</sup>**

7

8 <sup>1</sup>State Key Laboratory of Genetic Engineering, School of Life Sciences, Zhongshan  
9 Hospital, Fudan University, Shanghai 200438, China; <sup>2</sup>State Key Laboratory of Medical  
10 Molecular Biology, Institute of Basic Medical Sciences, Chinese Academy of Medical  
11 Sciences, Peking Union Medical College, Beijing 100005, China; <sup>3</sup>Key Laboratory of  
12 Medical Molecular Virology (MOE/NHC/CAMS), School of Basic Medical Sciences,  
13 Shanghai Medical College, Fudan University, Shanghai 200032, China; <sup>4</sup>Institute of  
14 Antibiotics, Huashan Hospital, Fudan University, Shanghai 200040, China; <sup>5</sup>Sino  
15 Organoid Lifesciences Ltd., Shanghai 201900, China; <sup>6</sup>These authors contributed  
16 equally to this work.

17

18 \*Correspondence and requests for materials should be addressed to B.Z.  
19 (bingzhao@fudan.edu.cn), J.L. (liangjunbo@ibms.pumc.edu.cn), R.Z.  
20 (rong\_zhang@fudan.edu.cn) or X.L. (xlin@fudan.edu.cn).

21

22

23

24 Short title: The novel coronavirus injures cholangiocytes

25

26 Keywords: SARS-CoV-2; human liver organoids; ACE2+ cholangiocytes; liver damage

27

28 **The newly emerged pandemic coronavirus, SARS-CoV-2, has posed a significant**  
29 **public health threat worldwide. However, the mode of virus transmission and**  
30 **tissue tropism is not well established yet. Recent findings of substantial liver**  
31 **damage in patients and ACE2+ cholangiocytes in healthy liver tissues prompted us**  
32 **to hypothesize that human liver ductal organoids could serve as a model to**  
33 **determine the susceptibility and mechanisms underlining the liver damage upon**  
34 **SARS-CoV-2 infection. By single-cell RNA sequencing, we found that long-term liver**  
35 **ductal organoid culture preserved the human specific ACE2+ population of**  
36 **cholangiocytes. Moreover, human liver ductal organoids were permissive to**  
37 **SARS-CoV-2 infection and support robust replication. Notably, virus infection**  
38 **impaired the barrier and bile acid transporting functions of cholangiocytes through**  
39 **dysregulation of genes involved in tight junction formation and bile acid**  
40 **transportation, which could explain the bile acid accumulation and consequent**  
41 **liver damage in patients. These results indicate that control of liver damage caused**  
42 **directly by viral infection should be valued in treating COVID-19 patients. Our**  
43 **findings also provide an application of human organoids in investigating the**  
44 **tropism and pathogenesis of SARS-CoV-2, which would facilitate novel drug**  
45 **discovery.**

## 46 **Introduction**

47 A recent outbreak of SARS-CoV-2 (previously named 2019-nCoV) infection in  
48 Wuhan (China) has caused emergent and significant threats to global public health<sup>1</sup>.  
49 The dominant symptoms of coronavirus disease 2019 (COVID-19) are fever and  
50 cough<sup>2,3</sup>. However, a proportion of patients showed multi-organ damage and  
51 dysfunction<sup>2-4</sup>. Of note, liver damage is emerging as a co-existed symptom reported  
52 in patients with COVID-19. A recent epidemiologic study in Shanghai (China)  
53 reported that 75 out of 148 (50.7%) COVID-19 patients had liver function  
54 abnormality, indicated by key liver function parameters above the normal range,  
55 including alanine aminotransferase (ALT), aspartate aminotransferase (AST), alkaline  
56 phosphatase (ALP) or total bilirubin (TBIL)<sup>5</sup>. A national wide clinical study collecting  
57 1,099 COVID-19 patients revealed that around 20% of patients had elevated ALT and  
58 AST and around 10% of patients had elevated TBIL. Especially, the percentage of  
59 patients with liver damage is much higher in severe patients than that in non-severe  
60 ones<sup>2</sup>. Although the clinical correlation has been implicated, it is still unclear whether  
61 the liver damage is caused by direct virus infection in the liver or by systematic  
62 reasons such as cytokine storm.

63 Viruses bind to host receptors to initiate the infection. Recent studies have  
64 demonstrated that both SARS-CoV-2 and SARS-CoV use the same  
65 angiotensin-converting enzyme 2 (ACE2) protein to enter the cells<sup>6-10</sup>. It has been  
66 shown that ACE2 expression is widely distributed across human tissues, including  
67 lung, liver, kidney and multiple digestive tract organs<sup>11-13</sup>. A significant enrichment of

68 ACE2+ population in cholangiocytes compared to hepatocytes in human healthy liver  
69 was reported recently<sup>14</sup>, implying that SARS-CoV-2 might directly target ACE2+  
70 cholangiocytes in patients. However, whether the virus indeed infects human  
71 cholangiocytes thus causes local damage has not been addressed yet.

72 At present, due to the lack of suitable research models, studies on mechanisms of  
73 SARS-CoV-2 pathogenesis mainly depend on bioinformatics analysis, clinical  
74 characteristics and rare autopsy reports<sup>15</sup>. Here we report the use of human  
75 organoids as a tool to investigate the SARS-CoV-2 infection and induced tissue  
76 damage ex vivo at the cellular and molecular levels. By single-cell RNA sequencing,  
77 we found that long-term human liver ductal organoid culture preserved the human  
78 specific ACE2+ population of cholangiocytes. Moreover, human liver ductal  
79 organoids were susceptible to SARS-CoV-2 infection and support robust viral  
80 replication. Notably, virus infection impaired the barrier and bile acid transporting  
81 functions of cholangiocytes in human liver ductal organoids. These results suggest  
82 that the dysfunction of cholangiocytes induced by SARS-CoV-2 infection could  
83 contribute to the bile acid accumulation and consequent liver damage in patients,  
84 and control of liver damage should be valued in treating COVID-19 patients. Our  
85 findings also provide a useful model of SARS-CoV-2 infection for pathogenesis study  
86 and novel drug discovery.

## 87 **Results**

### 88 **ACE2+ cholangiocytes are preserved in human liver ductal organoid cultures.**

89 To establish the SARS-CoV-2 infection model with human liver ductal organoids,  
90 we first determined whether the long-term organoid culture could preserve the  
91 ACE2+ cholangiocytes ex vivo. We processed single-cell RNA sequencing (scRNA-seq)  
92 to interrogate the transcriptome of cholangiocytes in human liver ductal organoids.  
93 A total number of 7,978 cells were analyzed and cell populations were visualized by  
94 t-distributed stochastic neighbor embedding (t-SNE), partitioning the cells into 7  
95 clusters (Fig. 1A). The common cholangiocyte markers *EPCAM* and *KRT19* were  
96 uniformly highly expressed in all the 7 clusters, indicating the heterogeneity of  
97 cholangiocytes in these organoids was relatively low (Fig. 1B). Notably, we identified  
98 the SARS-CoV-2 receptor gene *ACE2* expressed sparsely among cluster 0-5 in  
99 unbiased preferences and was detectable in 2.92% cells (233 out of 7,978) (Fig. 1C,  
100 D). Anti-ACE2 immunostaining further verified the presence of ACE2+ cholangiocytes  
101 in human liver ductal organoids (Fig. 1E). Interestingly, we found that the  
102 cholangiocytes in mouse primary liver ductal organoids had comparable *Epcam*  
103 expression but no *Ace2* (mouse *Ace2*) expression (Fig. 1F). Taken together, our data  
104 demonstrate that long-term human liver ductal organoid culture preserves the  
105 human specific ACE2+ population of cholangiocytes and the human liver ductal  
106 organoids could serve as a model to study the SARS-CoV-2 infection mediated by  
107 receptor ACE2.

108

109 **Recapitulation of SARS-CoV-2 infection in human Liver ductal organoids.**

110 We next examined the susceptibility of human liver ductal organoids to  
111 SARS-CoV-2. We isolated and plaque-purified the SARS-CoV-2 from a COVID-19  
112 patient in Shanghai. The liver ductal organoids from two individuals were inoculated  
113 with SARS-CoV-2 for 1 hour then re-embedded in Matrigel and maintained in culture  
114 medium. We performed immunostaining to identify the virus-positive cholangiocytes  
115 24 hours post infection. The expression of SARS-CoV-2 nucleocapsid protein was  
116 readily detected in patchy areas of human liver ductal organoids whereas no signal  
117 was found in uninfected control (Figure 2A). In addition, the infected cholangiocytes  
118 underwent membrane fusion and formed syncytia (Figure 2A, enlarge). Although the  
119 number of infected cholangiocytes was limited, qRT-PCR analysis of the SARS-CoV-2  
120 genomic RNAs revealed a dramatic increase of viral load in organoids at 24 hours  
121 post infection (Figure 2B). These data demonstrate that human liver ductal organoids  
122 are susceptible to SARS-CoV-2 and support robust viral replication. The  
123 recapitulation of SARS-CoV-2 infection in human organoids suggests that this model  
124 could be employed to dissect the viral pathogenesis and to test antivirals.

125

126 **SARS-CoV-2 infection impairs the barrier and bile acid transporting functions of**  
127 **cholangiocytes.**

128 The viral load in organoids was significantly decreased at 48 hours post infection  
129 (Figure 2B), probably due to virus-induced death of host cholangiocytes or activation  
130 of anti-viral response. This promoted us to detect whether SARS-CoV-2 infection  
131 could influence the tissue behavior.

132 The main function of cholangiocytes in homeostasis is to transport bile acid  
133 secreted by hepatocytes into bile ducts. The tight junction between cholangiocytes  
134 maintains the barrier function of bile ductal epithelium, which is essential for bile  
135 acid collection and excretion. We found that SARS-CoV-2 infection ablated the  
136 expression of Claudin1 (Figure 3), suggesting that the barrier function of  
137 cholangiocytes was disrupted. More importantly, the expression of two major bile  
138 acid transporters, apical sodium-dependent bile acid transporter (ASBT) and cystic  
139 fibrosis transmembrane conductance regulator (CFTR), was significantly reduced  
140 following SARS-CoV-2 infection (Figure 3). These data indicate that SARS-CoV-2  
141 infection impairs the barrier and bile acid transporting functions of cholangiocytes  
142 through modulating the expression of genes involved in tight junction formation and  
143 bile acid transportation. Our study therefore supports the idea that the liver damage  
144 in COVID-19 patients might be resulted from direct cholangiocyte injury and  
145 consequent bile acid accumulation induced by viral infection.

## 146 **Discussion and Conclusion**

147 Organoids retain the biology of individual tissues, which hold great promise for the  
148 study of host–microbe interaction<sup>16</sup>. Here we demonstrated that long-term human  
149 liver ductal organoid culture preserves the human specific ACE2+ population of  
150 cholangiocytes. The SARS-CoV-2 exposure experiments revealed that the virus infects  
151 and replicates efficiently in these organoids. To our knowledge, this is the first  
152 SARS-CoV-2-human organoid infection model reported. Given that the culture  
153 conditions for various organoids (lung, intestine and kidney) have been established, it  
154 would be intriguing to study the tropism, replication, and innate immune response of  
155 SARS-CoV-2 infection in other organs that are targeted by this virus.

156 It appears that liver dysfunction or damage in severe patients with COVID-19 is a  
157 common but unignored phenomena. The improper use of anti-viral drugs may be  
158 hepatotoxic and cause liver damage. On the other hand, SARS-CoV-2 infection may  
159 trigger overwhelming inflammatory response and lead to tissue injury at multi-organ  
160 levels including the liver<sup>2</sup>. In this study, by using the human liver ductal organoids as  
161 model, we have clearly shown that SARS-CoV-2 can infect the cholangiocytes and  
162 impair their barrier and bile acid transporting functions. This could be due to the  
163 direct viral cytopathogenic effect on target cells that express the ACE2 as entry  
164 receptor. The viral infection may also down-regulate the expression of host genes  
165 involved in the formation of tight junction and transportation of bile acid. Thus, it is  
166 noteworthy to take into account the fact that the liver damage in COVID-19 patients  
167 might be in part the result of direct cholangiocyte injury and consequent bile acid



168 accumulation caused by SARS-CoV-2 infection, which should be cautious in clinical  
169 treatment.

170 By employing human liver ductal organoids, we have investigated the infection and  
171 liver tissue damage of SARS-CoV-2 ex vivo. Besides the dissection of viral  
172 pathogenesis, this platform could also be applied to evaluate the efficacy of novel  
173 anti-viral drugs, especially when ideal animal models are lacking.

174

## 175 **Methods**

### 176 **Human biopsy.**

177 Human liver biopsies were obtained and used for research purposes with approval  
178 from the Medical Ethical Council of Zhongshan Hospital. The study abides by the  
179 Declaration of Helsinki principles.

180

### 181 **Virus stock preparation.**

182 SARS-CoV-2 was isolated from a COVID-19 patient in Shanghai, China  
183 (SARS-CoV-2/SH01/human/2020/CHN, GenBank accession no. MT121215). Virus was  
184 plaque-purified, propagated in Vero-E6 cells, and stored at  $-80^{\circ}\text{C}$  for use. All  
185 experiments involving virus infections were done in biosafety level 3 facility strictly  
186 following the regulations.

187

### 188 **Liver ductal organoid culture and SARS-CoV-2 infection.**

189 The human ductal organoids were generated from primary bile ducts isolated  
190 from human liver biopsies as described by Huch et al<sup>17</sup>. The organoids embedded in  
191 Matrigel (Corning, 356231) were scrambled off the plate and collected in tubes, then  
192 washed with cold PBS by pipetting the material up and down for 10 times. After  
193 centrifugation (2 min at 250 g), the organoid pellet was suspended with medium  
194 containing 5  $\mu\text{M}$  Y-27632 (Sigma-Aldrich, Y0503). Around 200-300 organoids were  
195 infected with  $1.2 \times 10^5$  PFU of SARS-CoV-2 in 24 well plate containing 500 $\mu\text{L}$  medium  
196 and incubated at 37  $^{\circ}\text{C}$  for 1 hour. After incubation, organoids were collected by

197 pipetting and washed once with PBS, then repeated the centrifugation and removed  
198 supernatant. The organoids were embedded with Matrigel, followed by seeding on a  
199 24-well plate. After polymerization, culture medium was added.

200

#### 201 **Immunofluorescence.**

202 For whole mounting liver organoids staining, organoids were fixed in 4%  
203 paraformaldehyde for 30 min at 4 °C, washed with PBS and permeabilized with 0.25%  
204 Triton X-100 (Sigma-Aldrich, X100) in PBS for 30 min. The organoids were then  
205 washed with PBST (PBS containing 0.1% Tween 20) and blocked by 5% BSA in PBST  
206 for 1 hour at room temperature. Organoids were incubated with the primary  
207 antibodies at 4 °C overnight, washed with PBST 3 times, and incubated with the  
208 secondary antibodies and DAPI for 1 hour at room temperature. Organoids imaging  
209 was performed on confocal microscope (OLYMPUS, FV3000). The following  
210 antibodies were used: rabbit anti-ACE2 (Sino Biological Inc, 10108-RP01, 1:100),  
211 rabbit anti-SARS-CoV-2 N protein (Rockland, 200-401-A50, 1:500), mouse  
212 anti-E-cadherin (BD Biosciences, 610181), Cy3-conjugated donkey anti-rabbit IgG  
213 (Jackson Lab, 711-165-152), Alexa Fluor 488-conjugated donkey anti-mouse IgG  
214 (Jackson Lab, 715-545-151).

215

#### 216 **Quantitative RT-PCR.**

217 Total RNA was isolated from organoids by RNeasy Mini kit (QIAGEN,74106) and  
218 reverse-transcribed into cDNA with M-MLV Reverse Transcriptase (Invitrogen,

219 28025013). Quantitative real-time PCR was performed on CFX384 Touch System (Bio  
220 Rad). Primers used were listed in Table 1. The SARS-CoV-2 primer and probe sets  
221 were provided by Integrated DNA Technologies (IDT, 10006606).

222

### 223 **Single-cell RNA seq and data analysis.**

224 Single-cell RNA sequencing was performed using the 10x Genomics Chromium  
225 System. Human liver ductal tissues were derived from a patient who underwent  
226 resection, cultured for 3 passages as described above. Mouse primary liver ductal  
227 organoids were cultured from biliary ducts isolated from an 8-week-old C57BL/6  
228 mouse. Briefly, organoids were dissociated with 1× TrypLE Select Enzyme (Gibco,  
229 12563011) to obtain single cell suspension. A total of around 8,000 cells per sample  
230 were captured on a 10×Chromium device and library preparation was carried out  
231 using Single Cell 3' Reagent Kits v2 according to the manufacturer's instructions (10×  
232 Genomics). Libraries were sequenced on an Illumina NovaSeq 6000 platform.

233 Cell Ranger (version 3.1) with default parameters was used to process sequencing  
234 data to generate feature-barcode matrices. The human dataset was analyzed using  
235 the standard workflow on the Seurat R Package (version 3.1.3) (Butler et al., 2018).  
236 For the feature-barcode matrix of 8,094 cells from the human dataset, we removed  
237 cells with less than 500 genes and more than 6,000 genes as well as cells with high  
238 fraction of mitochondrial UMIs (> 20%). 7,978 high quality cells and 17,447  
239 expressed genes were remained for downstream analysis. The cell populations were  
240 clustered using the 'FindClusters' function and visualized in 2 dimensions by

241 t-distributed stochastic neighbor embedding (t-SNE) derived from the top 10  
242 principal components. For the feature-barcode matrix of 9,690 cells from the mouse  
243 dataset, we retained cells with expressed genes between 500 and 6,000 as well as  
244 cells with low fraction of mitochondrial UMIs (< 10%). Finally, 8,812 high quality cells  
245 and 16,019 expressed genes were remained for downstream analysis. The  
246 integration of human and mouse datasets was processed by the standard Seurat v3  
247 integration workflow.

248

#### 249 **Statistical analysis.**

250 We employed Student's *t*-test or ANOVA test to analyze the parametric  
251 experimental results. Significant differences were noted with asterisks.

## 252 **Acknowledgments**

253 The authors thank Dr. Stacey S. Huppert for technical assistance. We also wish to  
254 acknowledge Di Qu, Xia Cai, Zhiping Sun, Wendong Han and the others at Biosafety  
255 Level 3 Laboratory of Fudan University for experiment design and expert technical  
256 assistance. This work was supported by grants from the National Key Research and  
257 Development Program of China (2018YFA0109400 and 2018YFA0109800), the  
258 Zhejiang University Special Scientific Research Fund for COVID-19 Prevention and  
259 Control (2020XGZX013) and the Shanghai Municipal Science and Technology Major  
260 Project (2017SHZDZX01). B.Z. was sponsored by Shanghai Rising-Star Program and  
261 Eastern Scholar Program.

262

## 263 **Author Contributions**

264 B.Z., C.N. and R.Z. conceived the study; B.Z., C.N., R.G., Y.W., L.Y., J.W., T.L., J.L.,  
265 W.X.,. and R.Z. performed the experiments; B.Z., J.L., R.Z. and X.L. supervised the  
266 work; Y.X X.W. and Z.Y. contributed to the discussion of the results; and B.Z., C.N.,  
267 R.Z. and X.L. wrote the manuscript.

268

## 269 **Conflict of interest**

270 The authors declare that they have no conflict of interest.

271

## 272 References

273

- 274 1 Wu, F. *et al.* A new coronavirus associated with human respiratory disease in China. *Nature*,  
275 doi:10.1038/s41586-020-2008-3 (2020).
- 276 2 Huang, C. *et al.* Clinical features of patients infected with 2019 novel coronavirus in Wuhan,  
277 China. *Lancet*, doi:10.1016/S0140-6736(20)30183-5 (2020).
- 278 3 Chen, N. *et al.* Epidemiological and clinical characteristics of 99 cases of 2019 novel  
279 coronavirus pneumonia in Wuhan, China: a descriptive study. *Lancet*,  
280 doi:10.1016/S0140-6736(20)30211-7 (2020).
- 281 4 Zhu, N. *et al.* A Novel Coronavirus from Patients with Pneumonia in China, 2019. *N Engl J Med*,  
282 doi:10.1056/NEJMoa2001017 (2020).
- 283 5 Fan, Z. *et al.* Clinical Features of COVID-19 Related Liver Damage. *medRxiv* (2020).
- 284 6 Zhou, P. *et al.* A pneumonia outbreak associated with a new coronavirus of probable bat  
285 origin. *Nature*, doi:10.1038/s41586-020-2012-7 (2020).
- 286 7 Wan, Y., Shang, J., Graham, R., Baric, R. S. & Li, F. Receptor recognition by novel coronavirus  
287 from Wuhan: An analysis based on decade-long structural studies of SARS. *J Virol*,  
288 doi:10.1128/JVI.00127-20 (2020).
- 289 8 Chen, Y., Guo, Y., Pan, Y. & Zhao, Z. J. Structure analysis of the receptor binding of 2019-nCoV.  
290 *Biochem Biophys Res Commun*, doi:10.1016/j.bbrc.2020.02.071 (2020).
- 291 9 Kuhn, J. H., Li, W., Choe, H. & Farzan, M. Angiotensin-converting enzyme 2: a functional  
292 receptor for SARS coronavirus. *Cell Mol Life Sci* **61**, 2738-2743,  
293 doi:10.1007/s00018-004-4242-5 (2004).
- 294 10 Hoffmann, M. *et al.* SARS-CoV-2 Cell Entry Depends on ACE2 and TMPRSS2 and Is Blocked by  
295 a Clinically Proven Protease Inhibitor. *Cell*, doi:10.1016/j.cell.2020.02.052 (2020).
- 296 11 Zhao, Y. *et al.* Single-cell RNA expression profiling of ACE2, the putative receptor of Wuhan  
297 2019-nCoV. *bioRxiv*, doi:10.1101/2020.01.26.919985 (2020).
- 298 12 Zhang, H. *et al.* The digestive system is a potential route of 2019-nCoV infection: a  
299 bioinformatics analysis based on single-cell transcriptomes. *bioRxiv* (2020).
- 300 13 Qi, F., Qian, S., Zhang, S. & Zhang, Z. Single cell RNA sequencing of 13 human tissues identify  
301 cell types and receptors of human coronaviruses. *bioRxiv* (2020).
- 302 14 Chai, X. *et al.* Specific ACE2 Expression in Cholangiocytes May Cause Liver Damage After  
303 2019-nCoV Infection. *bioRxiv* doi:10.1101/2020.02.03.931766 (2020).
- 304 15 Xu, Z. *et al.* Pathological findings of COVID-19 associated with acute respiratory distress  
305 syndrome. *Lancet Respir Med*, doi:10.1016/S2213-2600(20)30076-X (2020).
- 306 16 Dutta, D. & Clevers, H. Organoid culture systems to study host-pathogen interactions. *Curr*  
307 *Opin Immunol* **48**, 15-22, doi:10.1016/j.coi.2017.07.012 (2017).
- 308 17 Huch, M. *et al.* Long-term culture of genome-stable bipotent stem cells from adult human  
309 liver. *Cell* **160**, 299-312, doi:10.1016/j.cell.2014.11.050 (2015).

310

311

312

313

314

**Figure 1**

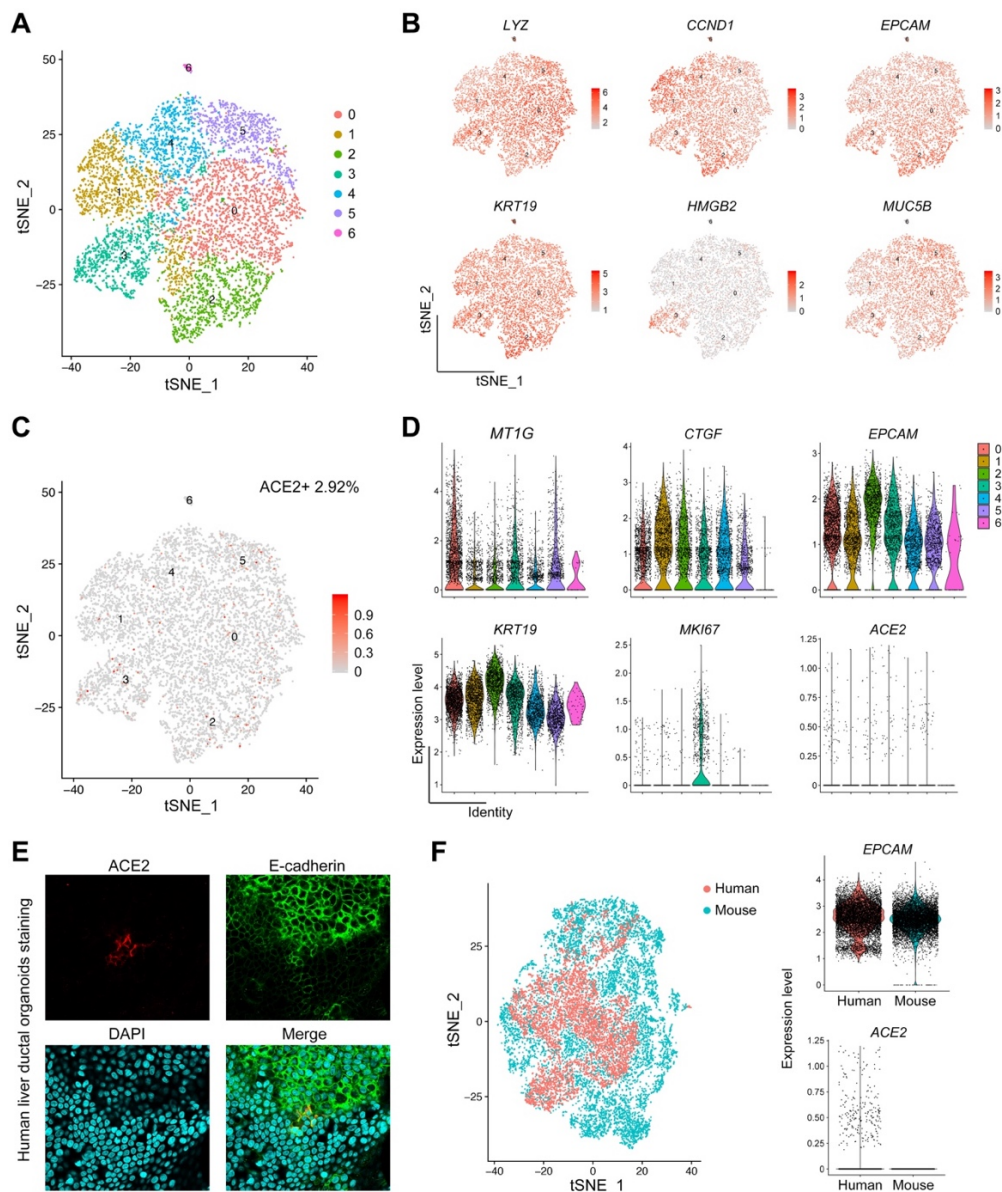

315

316 **Figure 1 | ACE2+ cholangiocytes are preserved in human liver ductal organoid**  
 317 **cultures.** (A) Cell-type clusters. t-SNE visualization of the cell populations  
 318 (color-coded for clusters) from human liver ductal organoids by t-SNE. (B) t-SNE  
 319 plots indicating the expression of representative marker genes. (C) t-SNE plots  
 320 indicating the expression of ACE2 gene. (D) Violin plots showing the expression of  
 321 representative marker genes. (E) Immunofluorescence staining for ACE2 and  
 322 E-cadherin in human liver ductal organoids. Results were representative of three  
 323 independent experiments. (F) t-SNE visualization of single cells isolated from human  
 324 and mouse liver ductal organoids; Violin plots showing the expression of EPCAM and  
 325 ACE2.

326



327

Figure 2

328

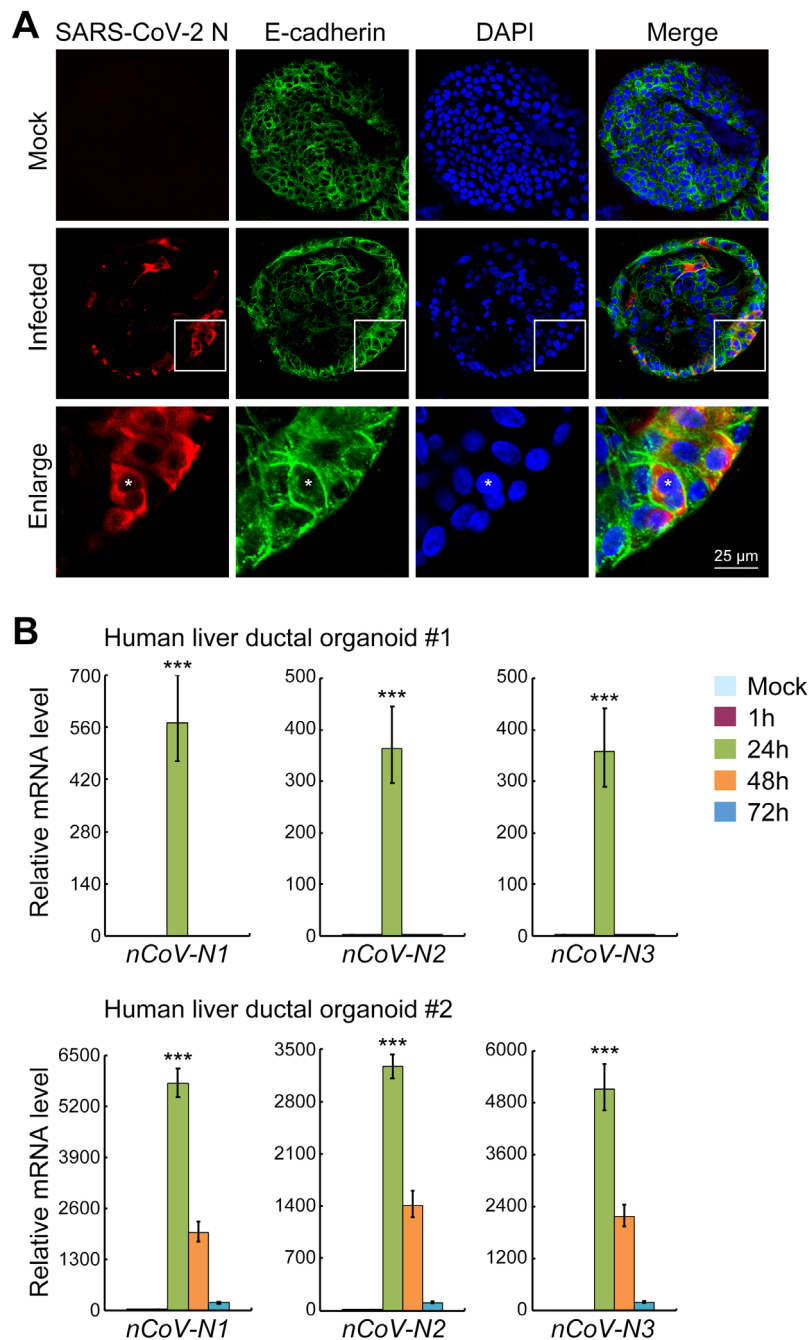

329

330 **Figure 2 | Recapitulation of SARS-CoV-2 infection in human Liver ductal**  
331 **organoids.** (A) Immunofluorescence staining for SARS-CoV-2 N protein and  
332 E-cadherin in human liver ductal organoids. (B) Two cases of human liver ductal  
333 organoids were harvested at indicated time points following SARS-CoV-2 infection to  
334 examine the virus load using qRT-PCR. *RNP* was used as an internal control. Data  
335 were presented as mean±s.d. \*\*\* indicates  $p < 0.001$ .

336

Figure 3

337

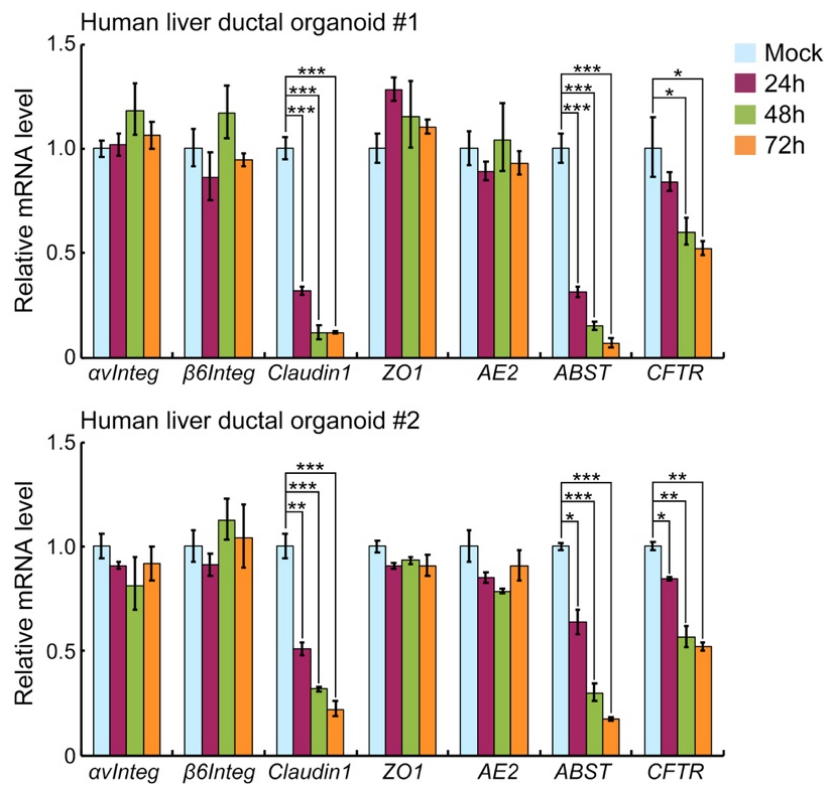

338

339 **Figure 3 | SARS-CoV-2 infection impairs the barrier and bile acid transporting**

340 **functions of cholangiocytes.** Two cases of human liver ductal organoids after

341 SARS-CoV-2 infection were harvested to examine the expression of indicated genes

342 using qRT-PCR. *GAPDH* was used as an internal control. Data were presented as

343 mean±s.d. \* indicates  $p < 0.05$ ; \*\* indicates  $p < 0.01$ ; \*\*\* indicates  $p < 0.001$ .

344

345 **Table 1 | Primers and probes for qRT-PCR.**

346

| TaqMan primers and probes | Oligonucleotide sequence (5'-3')  |
|---------------------------|-----------------------------------|
| <i>nCov-N1</i> forward    | GACCCCAAATCAGCGAAAT               |
| <i>nCov-N1</i> reverse    | TCTGGTTACTGCCAGTTGAATCTG          |
| <i>nCov-N1</i> probe      | FAM-ACCCCGCATTACGTTTGGTGGACC-BHQ1 |
| <i>nCov-N2</i> forward    | TTACAAACATTGGCCGCAA               |
| <i>nCov-N2</i> reverse    | GCGCGACATTCCGAAGAA                |
| <i>nCov-N2</i> probe      | FAM-ACAATTTGCCCCAGCGCTTCAG-BHQ1   |
| <i>nCov-N3</i> forward    | GGGAGCCTTGAATACACCAAAA            |
| <i>nCov-N3</i> reverse    | TGTAGCACGATTGCAGCATTG             |
| <i>nCov-N3</i> probe      | FAM-AYCACATTGGCACCCGCAATCCTG-BHQ1 |
| <i>RNP</i> forward        | AGATTTGGACCTGCGAGCG               |
| <i>RNP</i> reverse        | GAGCGGCTGTCTCCACAAGT              |
| <i>RNP</i> probe          | FAM-TTCTGACCTGAAGGCTCTGCGCG-BHQ1  |

347

| qRT-PCR primers    | Forward (5'-3')          | Reverse (5'-3')          |
|--------------------|--------------------------|--------------------------|
| <i>ACE2</i>        | CATTGGAGCAAGTGTGGATCTT   | GAGCTAATGCATGCCATTCTCA   |
| <i>GAPDH</i>       | GGTATCGTGGAAGGACTCATGAC  | ATGCCAGTGAGCTTCCCCTTCAG  |
| <i>av integrin</i> | GGGATGACAACCCTCTGAC      | GTTTCTCAGCTCATAGATGTG    |
| <i>β6 integrin</i> | CTGCTTTCCTGTTCTTTCTATTTC | GTTTCTGCACCTCCCAGGG      |
| <i>Claudin-1</i>   | GTGCGATATTTCTTCTTGCAAGTC | TTCGTACCTGGCATTGACTGG    |
| <i>JAM-A</i>       | GCGCAAGTCGAGAGGAAACT     | AAAAGCCCGAGTAGGCACAG     |
| <i>Claudin-4</i>   | GGCTGCTTTGCTGCAACTGTC    | GAGCCGTGGCACCTTACACG     |
| <i>ZO-1</i>        | GTGTTGTGGATACCTTGT       | GATGATGCCTCGTTCTAC       |
| <i>Muc2</i>        | GCGATGCCTACACCAAAGT      | TGATCTTCTGCATGTTCCCA     |
| <i>Muc5ac</i>      | GGACCAAGTGGTTTGACACTGAC  | CCTCATAGTTGAGGCACATCCCAG |
| <i>EP4</i>         | GACCTGTTGGGCACTTTGTT     | TGGACGCATAGACTGCAAAG     |
| <i>CFTR</i>        | TGACCTTCTGCCTCTTACCA     | CACTATCACTGGCACTGTTGC    |
| <i>AE2</i>         | TCCTCCCACCACATCCATCA     | CTCCTCAATGGTCCGGGGTTTC   |
| <i>ABST</i>        | CAGTTTGGAAATCATGCCCTC    | GCTATGAGCACAATGAGGATGG   |

348
